# Supplementary material for: Microbiome Structure in Biofilms From a Volcanic Island in Maritime Antarctica Investigated by Genome-Centric Metagenomics and Metatranscriptomics
Source: Research Square preprint supplement (doi:10.21203/rs.3.rs-151020/v1), 2021-01-21
Supplement: Supplementary file 1 [file 4915e8063c85eb52173242f7.xlsx]

## Sheet: Sheet1
Supplementary Table 1: Binning Statistics.
Binning	MAGs Quality
	High		Intermediate		Medium		Low		Bad		Total
	Sum	%	Sum	%	Sum	%	Sum	%	Sum	%
Metabat2	46	6.76471	89	13.0882	83	12.2059	244	35.8824	218	32.0588	680
Metabat1	23	5.80808	51	12.8788	55	13.8889	126	31.8182	141	35.6061	396
Maxbin	37	5.73643	84	13.0233	38	5.89147	115	17.8295	371	57.5194	645
Concoct	13	3.3419	30	7.71208	19	4.88432	66	16.9666	261	67.0951	389
Binsanity	0	0	33	2.47562	42	3.15079	819	61.4404	439	32.9332	1333
DAS_TOOL	57	11.6803	116	23.7705	67	13.7295	91	18.6475	156	31.9672	488
High: ≥ 90% completeness, ≤ 5% contamination
Intermediate: ≥ 70% completeness, ≤ 10% contamination
Medium: ≥ 50% completeness, ≤ 10% contamination
Low: ≤ 50% completeness, ≤ 10% contamination
Bad: > 10% contamination
